# Supplementary material for: A molecular dynamics study of human endostatin and its synthetic fragments with antiangiogenic properties
Source: Royal Society of Chemistry journal article supplement (doi:10.1039/b604811k), 2006-01-01
Supplement: b604811k.pdf [file b604811k.pdf]

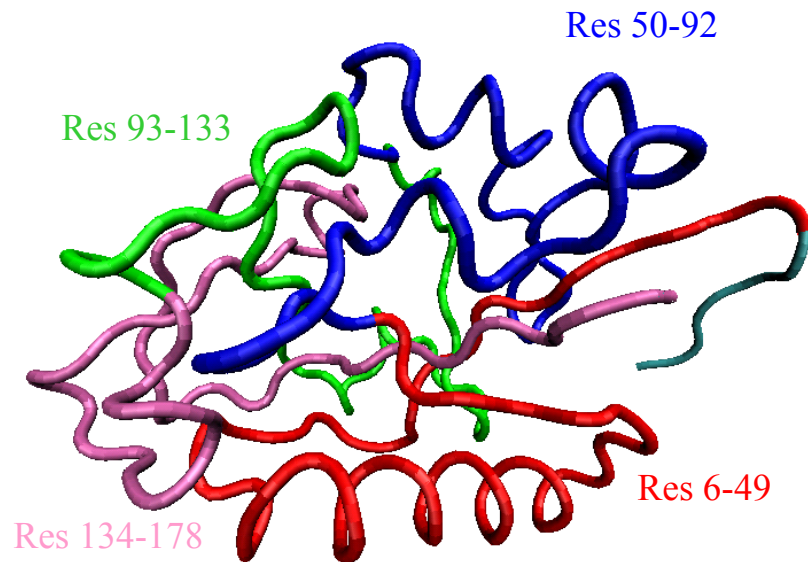

**Supplementary figure 1.** Human endostatin structure. Fragments 6-49 (red), 50-92 (blue), 93-133 (green) and 134-178 (mauve) are shown.

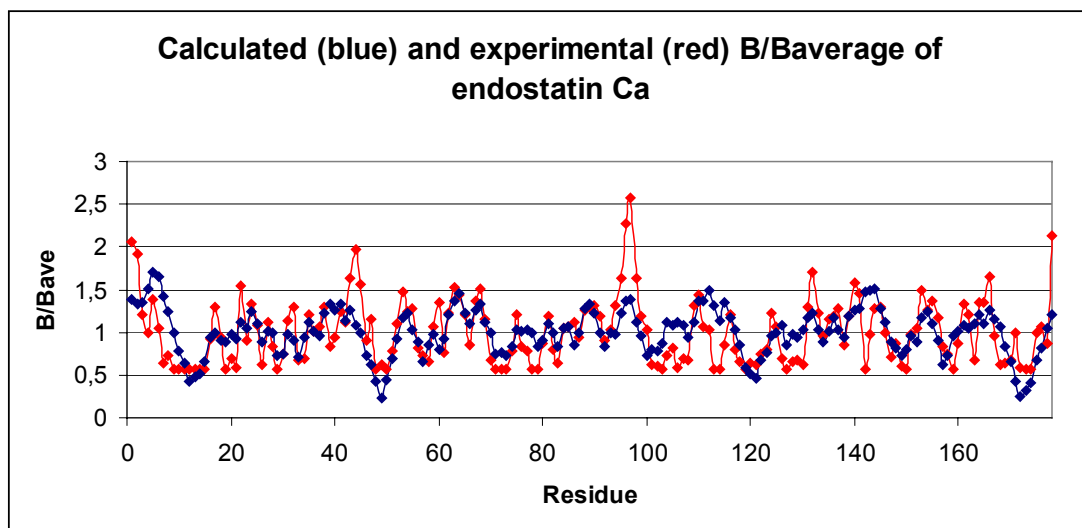

**Supplementary figure 2.** Calculated (blue) and experimental (red) values of  $B/B_{\text{average}}$  for  $C_{\alpha}$  carbons of full-length hE.

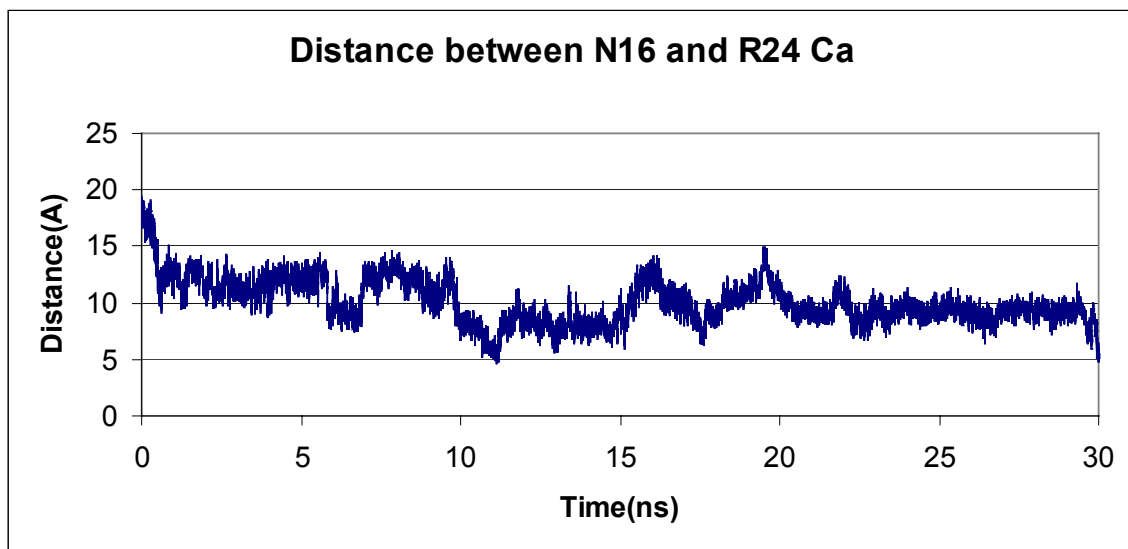

**Supplementary figure 3.** Distance between the Ca atoms of N<sub>16</sub> and R<sub>24</sub>.
